# Supplementary material for: The exceptional adsorption ability and gas-detection sensitivity of Cu2O with tunable morphologies
Source: Royal Society of Chemistry journal article supplement (doi:10.1039/c7ra06453e), 2017-01-01
Supplement: c7ra06453e1.pdf [file c7ra06453e1.pdf]

## Simple Tailoring Fabrication of Cu<sub>2</sub>O Nanostructures and Their Corresponding Adsorption Ability

Xing Wang, Meizhen Gao\*, Xuejian Huo, Elisee Muhire

Key Laboratory for Magnetism and Magnetic Materials of MOE, School of Physical Science and Technology, Lanzhou University, 730000 Lanzhou, China

\*Corresponding author. E-mail: gaomz@lzu.edu.cn; Tel: +86 931 8914160

The concentration of MO is recorded by the UV-Vis spectrum, which can be obtained through Bee-Lambert law in which the absorbance for MO versus concentration obeys a linear relationship at low concentration of MO as shown in **Fig. S1**. The adsorbance of MO ( $q_t$ , mg g<sup>-1</sup>) at time  $t$  was calculated using the following formula [Eq. (1)]:

$$q_t = \frac{(C_0 - C_t) \times V}{m} \quad (1)$$

Where  $C_0$  (mg L<sup>-1</sup>) and  $C_t$  (mg L<sup>-1</sup>) are the initial and final concentration of MO at time  $t$ ,  $V$  (mL) is the volume of the solution and  $m$  (mg) is the mass of Cu<sub>2</sub>O.

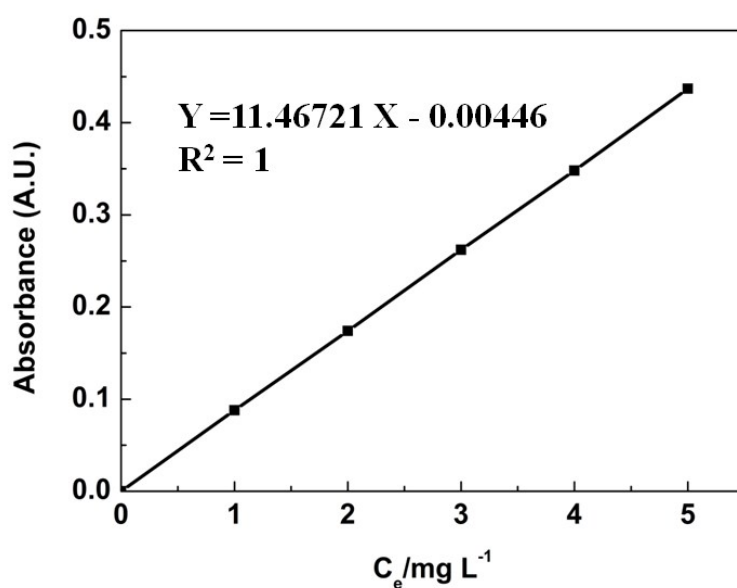

**Figure S1.** The standard curve of MO solution.

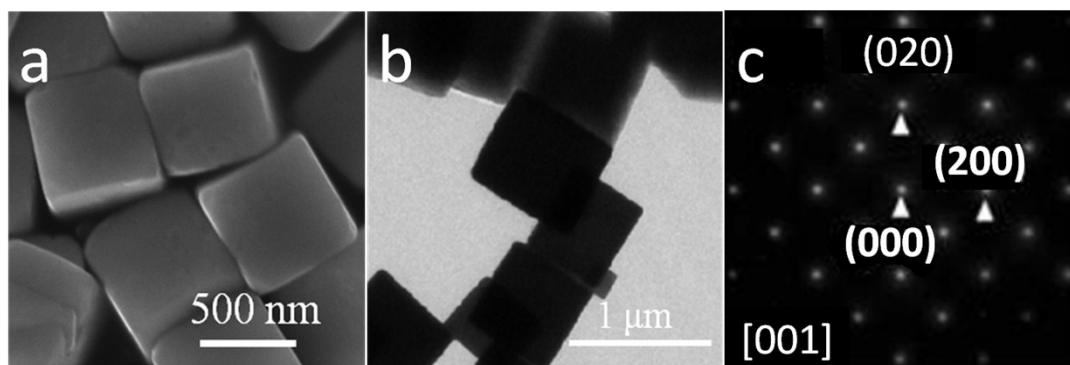

**Fig. S2** The detailed structure analysis of the Cu<sub>2</sub>O cube.

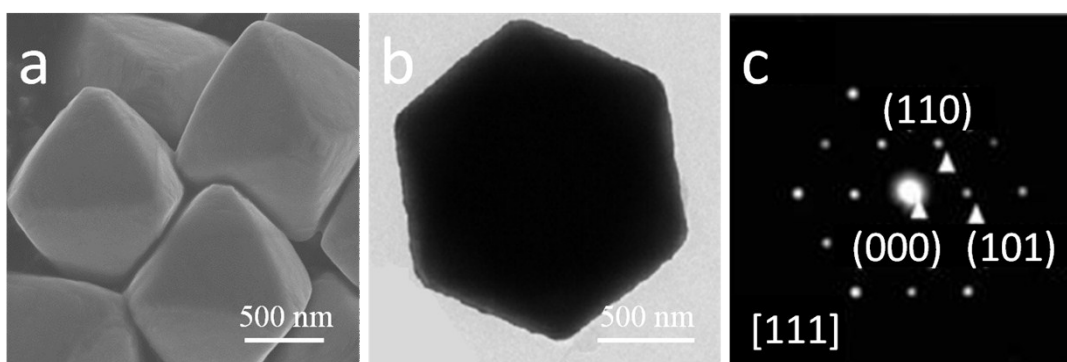

**Fig. S3** The detailed structure analysis of the Cu<sub>2</sub>O octahedron.

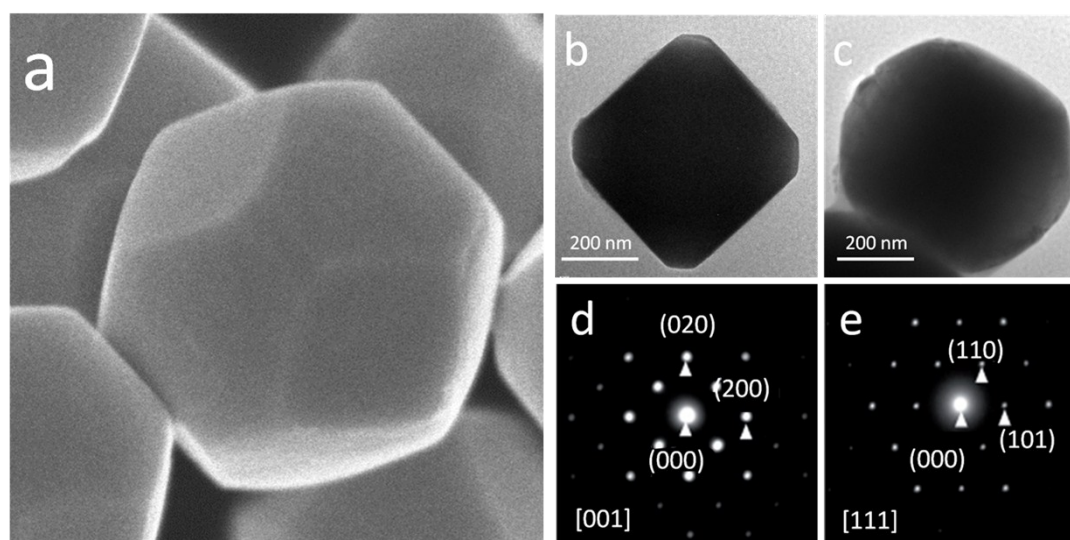

**Figure S4.** The detailed structure analysis of the Cu<sub>2</sub>O cubooctahedron.

As for a cubic structure in **Fig S2**, the exposed surfaces are made of six {100} facets.

If the electron beam is aligned to be perpendicular to  $\{001\}$ , a two-dimensional (2-D) square-shaped projection will be observed. For octahedral structures as depicted in **Fig. S3**, viewed along  $[110]$  zone axis, the projection drawing of the octahedron is a parallelogram made of the projections of four  $\{111\}$  facets. **Fig. S4a** shows the SEM of a signal cubooctahedron  $\text{Cu}_2\text{O}$ . **Fig. S4b** shows the TEM of cubooctahedron when the electron beam is aligned to be perpendicular to  $\{001\}$ , a two dimensional square-shaped projection is observed. The corresponding SAED is shown in **Fig. S4d**. With  $[111]$  as the viewing direction, the projection changes into an equilateral hexagon constructed by the edges of  $[100]$  and  $[111]$  (**Fig. S4c**). The corresponding diffraction pattern is shown in **Fig. S4e**.

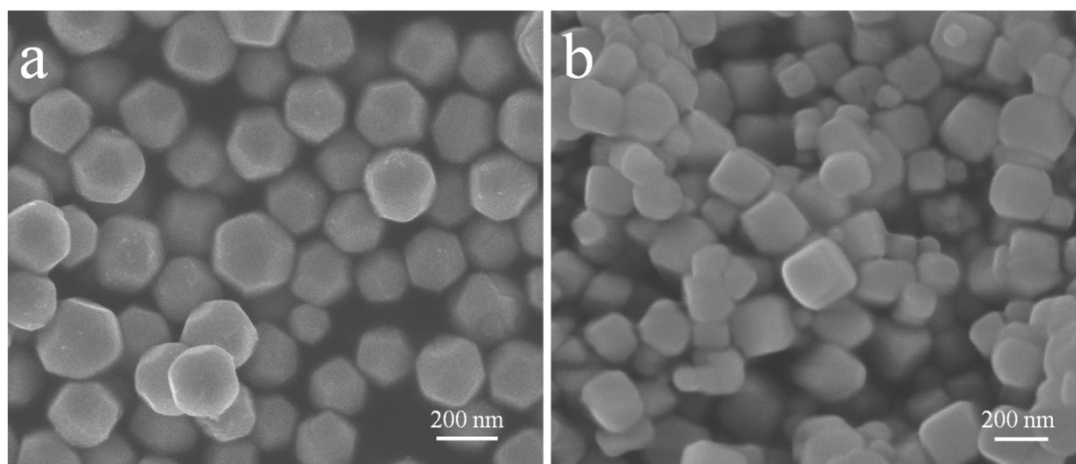

**Figure S5.** SEM images of  $\text{Cu}_2\text{O}$  nanostructures synthesized at different conditions: all the concentration of  $\text{NaOH}$  is 0.6 M, (a) cubooctahedrons: the volume of solvent is 60 mL, (b) cubes: the volume of solvent is 150 mL.

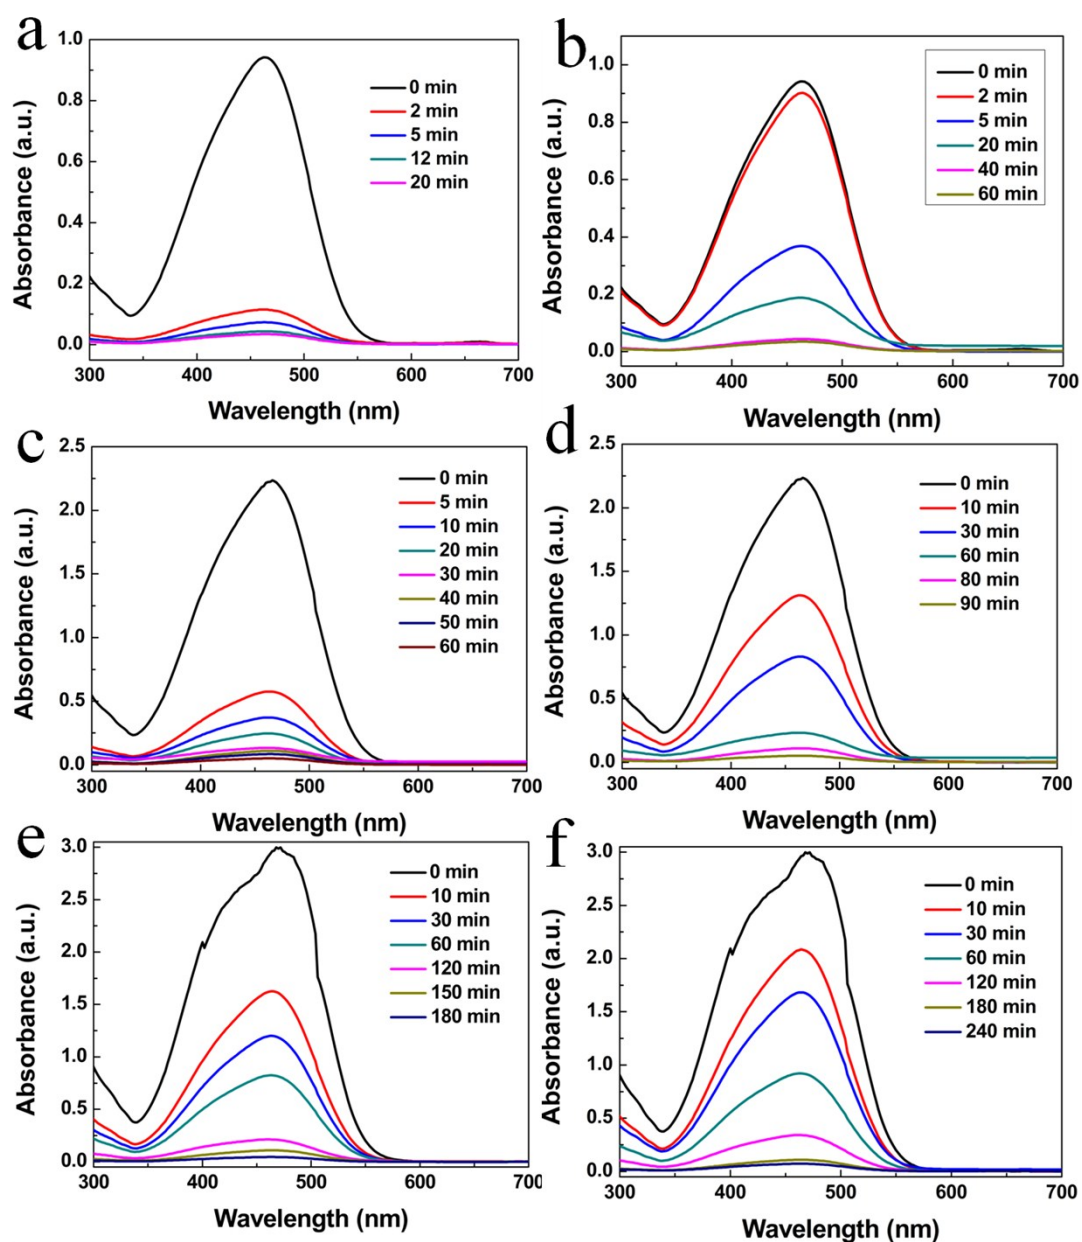

**Figure S6. a), c) and e):** adsorption spectra of the MO solution in the presence of hollow Cu<sub>2</sub>O. **b), d) and f):** adsorption spectra of the MO solution in the presence of octahedron Cu<sub>2</sub>O. (a and b) 15 mg/L, c) and d) 30 mg/L, e) and f) 50 mg/L)

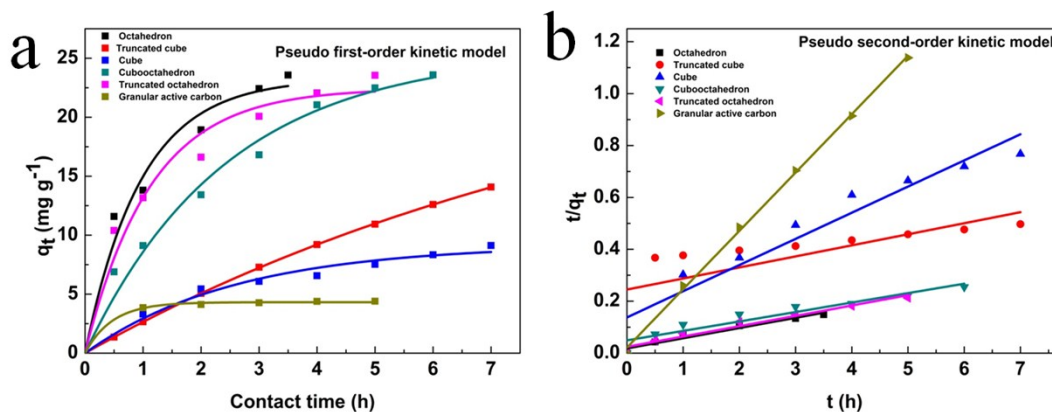

**Figure S7.** Adsorption kinetics of methyl orange on Cu<sub>2</sub>O with different geometries, a) pseudo-first-order kinetic plots, and b) pseudo-second-order plots.

**Table S1**

The kinetic parameters obtained from IPD fitting on the adsorption process for Cu<sub>2</sub>O with different geometries

| Pseudo-first order     | q <sub>e</sub> (mg g <sup>-1</sup> ) | k <sub>1</sub> (h <sup>-1</sup> ) | R <sup>2</sup> |
|------------------------|--------------------------------------|-----------------------------------|----------------|
| cube                   | 9.2                                  | 0.24                              | 0.97532        |
| Truncated cube         | 28.02                                | 0.38                              | 0.99997        |
| Cubooctahedron         | 25.54                                | 0.41                              | 0.98202        |
| Truncated octahedron   | 22.46                                | 0.89                              | 0.96344        |
| Octahedron             | 23.77                                | 1.03                              | 0.9703         |
| Granular active carbon | 4.31                                 | 2.15                              | 0.99734        |
| Pseudo-second order    | q <sub>e</sub> (mg g <sup>-1</sup> ) | k <sub>2</sub> (h <sup>-1</sup> ) | R <sup>2</sup> |
| cube                   | 9.92                                 | 0.01                              | 0.90421        |
| Truncated cube         | 23.48                                | 0.01                              | 0.43993        |
| Cubooctahedron         | 27.53                                | 0.03                              | 0.89343        |
| Truncated octahedron   | 25.15                                | 0.06                              | 0.95881        |
| Octahedron             | 25.39                                | 0.09                              | 0.94373        |
| Granular active carbon | 4.45                                 | 2.35                              | 0.99856        |

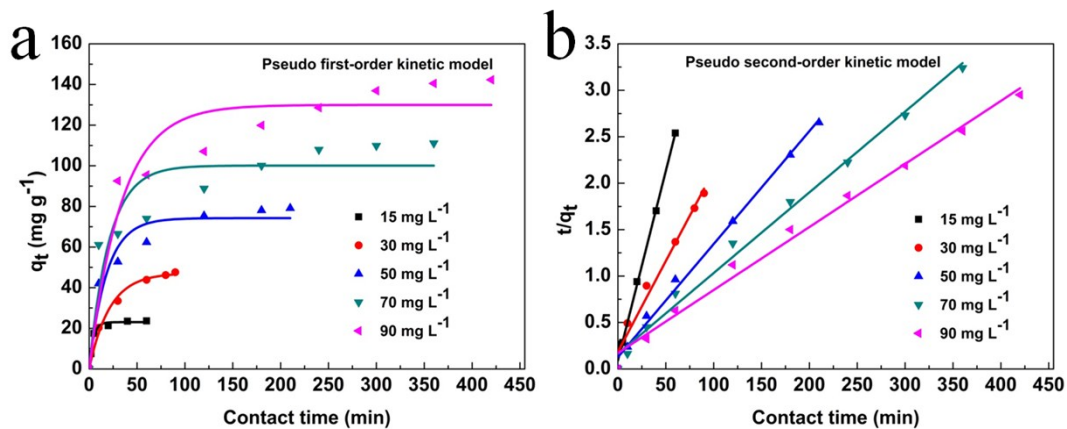

**Figure S8.** Adsorption kinetics of methyl orange on small octahedral  $\text{Cu}_2\text{O}$ , a) pseudo-first-order kinetic plots, and b) pseudo-second-order plots.

**Table S2**

The kinetic parameters obtained from IPD fitting on the adsorption process for  $\text{Cu}_2\text{O}$  with small octahedron

| Pseudo-first order          | 15 mg L <sup>-1</sup> | 30 mg L <sup>-1</sup> | 50 mg L <sup>-1</sup> | 70 mg L <sup>-1</sup> | 90 mg L <sup>-1</sup> |
|-----------------------------|-----------------------|-----------------------|-----------------------|-----------------------|-----------------------|
| $q_e$ (mg g <sup>-1</sup> ) | 22.99                 | 47.18                 | 74.23                 | 100.08                | 129.95                |
| $k_1$ (min <sup>-1</sup> )  | 0.245                 | 0.047                 | 0.055                 | 0.048                 | 0.030                 |
| $R^2$                       | 0.9825                | 0.96992               | 0.92755               | 0.83689               | 0.91394               |
| Pseudo-second order         | 15 mg L <sup>-1</sup> | 30 mg L <sup>-1</sup> | 50 mg L <sup>-1</sup> | 70 mg L <sup>-1</sup> | 90 mg L <sup>-1</sup> |
| $q_e$ (mg g <sup>-1</sup> ) | 23.65                 | 51.26                 | 82.17                 | 115.07                | 146.63                |
| $k_2$ (min <sup>-1</sup> )  | 0.018                 | 0.001                 | 0.001                 | 0.0005                | 0.0003                |
| $R^2$                       | 0.99526               | 0.99427               | 0.9935                | 0.99429               | 0.99                  |

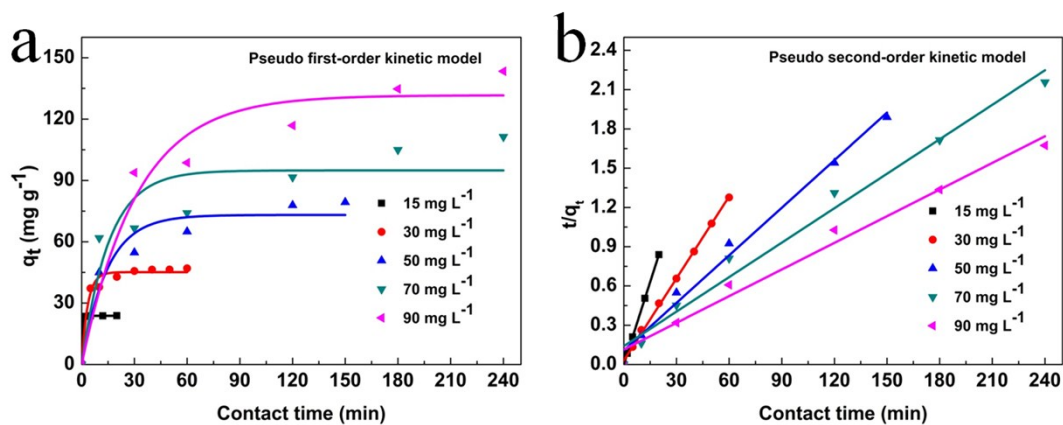

**Figure S9.** Adsorption kinetics of methyl orange on hollow sphere  $\text{Cu}_2\text{O}$ , a) pseudo-first-order kinetic plots, and b) pseudo-second-order plots.

**Table S3**

The kinetic parameters obtained from IPD fitting on the adsorption process for  $\text{Cu}_2\text{O}$  with hollow sphere

| Pseudo-first order          | 15 mg L <sup>-1</sup> | 30 mg L <sup>-1</sup> | 50 mg L <sup>-1</sup> | 70 mg L <sup>-1</sup> | 90 mg L <sup>-1</sup> |
|-----------------------------|-----------------------|-----------------------|-----------------------|-----------------------|-----------------------|
| $q_e$ (mg g <sup>-1</sup> ) | 23.79                 | 45.12                 | 73.11                 | 94.89                 | 131.66                |
| $k_1$ (min <sup>-1</sup> )  | 2.197                 | 0.296                 | 0.0698                | 0.065                 | 0.032                 |
| $R^2$                       | 0.99999               | 0.97212               | 0.92295               | 0.8227                | 0.94033               |
| Pseudo-second order         | 15 mg L <sup>-1</sup> | 30 mg L <sup>-1</sup> | 50 mg L <sup>-1</sup> | 70 mg L <sup>-1</sup> | 90 mg L <sup>-1</sup> |
| $q_e$ (mg g <sup>-1</sup> ) | 23.87                 | 47.85                 | 82.51                 | 113.9                 | 147.28                |
| $k_2$ (min <sup>-1</sup> )  | 1.35                  | 0.014                 | 0.001                 | 0.0005                | 0.0004                |
| $R^2$                       | 0.99999               | 0.99843               | 0.98777               | 0.97915               | 0.97821               |

Weber and Moris's intraparticle diffusion model also can show the intraparticle diffusion resistance affecting adsorption, which is presented as follows:

$$q_t = k_{ip}t^{1/2} + C_i$$

Where  $C_i$  is a constant related to thickness and boundary layer ( $\text{mg g}^{-1}$ ),  $k_{ip}$  is the diffusion rate constant ( $\text{mg g}^{-1} \text{s}^{-1/2}$ ) [1]. The  $q_t$  versus  $t^{1/2}$  plots for cubic, truncated cubic, cubooctahedral, truncated octahedral and octahedral  $\text{Cu}_2\text{O}$  structures show three reaction steps in the adsorption process (one typical plot is shown as **Figure S10**). For the first stage, the oblique line represents the surface adsorption of MO onto the  $\text{Cu}_2\text{O}$  which can be attributed to electrostatic attraction between the positively charged surface of  $\text{Cu}_2\text{O}$  and the negatively charged MO dye ions. The second line corresponds to intraparticle diffusion process, in which the MO dye ions enter into the inner adsorption sites via the nanoscale channels and adsorb on the surface of ligaments [2]. Finally, the third part is the final equilibrium stage, and the slower intraparticles diffusion lead to the slope close to zero. **Figure S11** list the kinetic parameters of various  $\text{Cu}_2\text{O}$  morphology from the W – M intraparticle diffusion model.  $K_{d1}$  and  $K_{d2}$  represent the slopes of the first and second adsorption stage respectively,  $K_{d3}$  corresponding to the third stage are almost zero and is not listed in Figure 7 and Table S1. It is obvious that the  $K_{d1}$  values of cube, truncated cube, cubooctahedron, truncated octahedron and octahedron are gradually increased, which is agreement with the above analysis. And the  $K_{d1} > K_{d2}$  is due to that the MO ions compete with each other to penetrate into the nanoscale channels, result in diffusion resistance increasing and diffusion rate at the second stage decreasing [3].



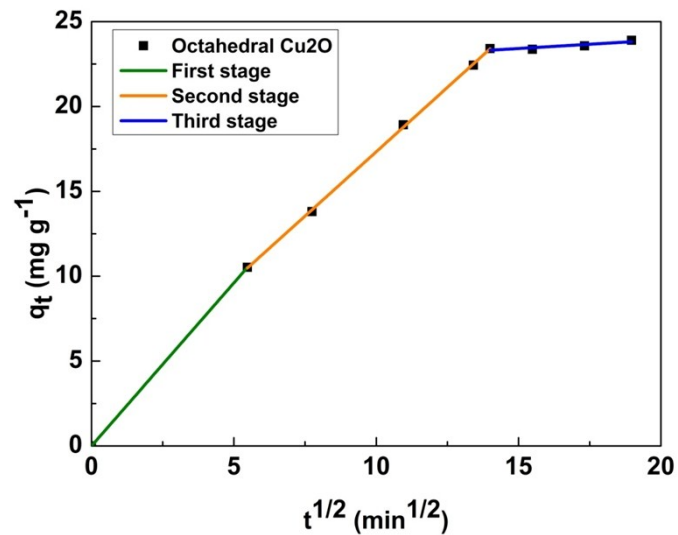

**Figure S10.** W-M intraparticles diffusion plots for octahedral show three linear correlations over the whole contact time range.

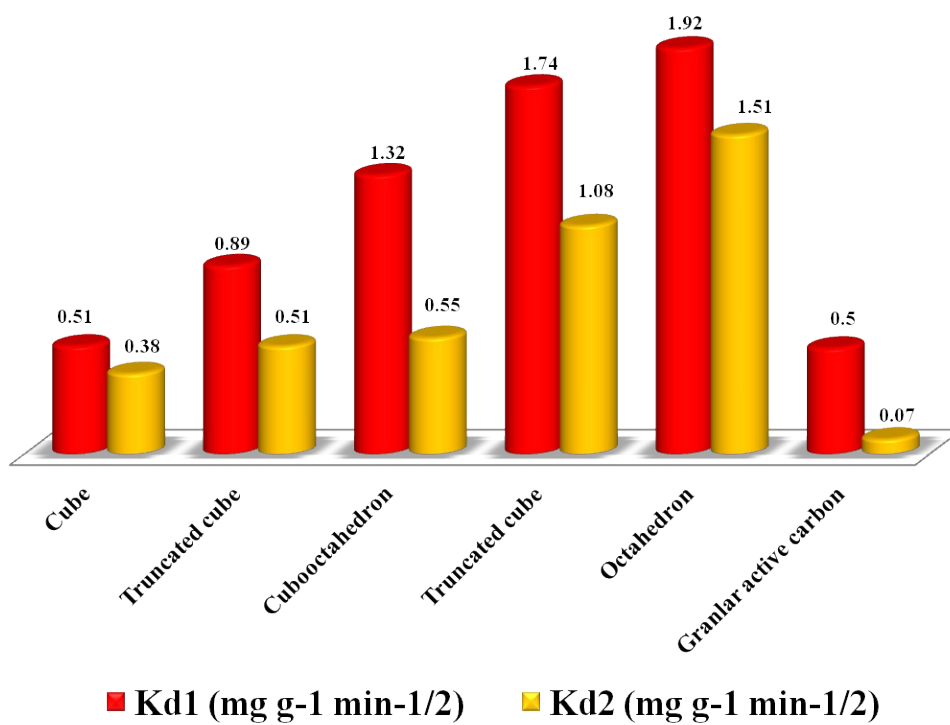

**Figure S11.** The kinetic parameters histograms for  $\text{Cu}_2\text{O}$  which obtained from W-M intraparticles diffusion model fitting on the adsorption process.  $K_{d1}$  and  $K_{d2}$  are the slopes of the first and second adsorption stage, respectively.

**Table S4**

Comparison of adsorption performances based on various Cu<sub>2</sub>O microstructures.

| Morphology of Cu <sub>2</sub> O | MO (mg/L) | Time (min) | Reference |
|---------------------------------|-----------|------------|-----------|
| Octahedrons                     | 15        | 360        | [4]       |
| Mesoporous spheres              | 20        | 40         | [5]       |
| Hollow submicropheres           | 10        | 60         | [6]       |
| Hollow sphere                   | 15        | 5          | This work |

**Table S5**

Comparison of adsorption performances based on various Cu<sub>2</sub>O microstructures.

| Morphology of Cu <sub>2</sub> O | Ethanol concentration (ppm) | Temperature (°C) | Sensor response | reference |
|---------------------------------|-----------------------------|------------------|-----------------|-----------|
| Hollow microspheres             | 10                          | 240              | 1.9             | [7]       |
| Cubic                           | 50                          | 200              | 2.64            | [8]       |
| Naanocages                      | 5                           | 210              | 1.56            | [9]       |
| Hollow sphere                   | 1                           | 240              | 2.36            | This work |

[1]. K. Wang, X. H. Wu, W. W. Wu, W. Chen, L. Q. Qin, X. M. Cui, *Journal of Thermal Analysis and Calorimetry*. 2015, 122, 653-663.

[2]. X. Q. Qiao, F. C. Hu, F. Y. Tian, D. F. Hou, D. S. Li, *RSC Advance*. 2016, 6, 11631-11636.

[3]. E. Demirbas, M. Kobya, M. T. Sulak, *Bioresource technology*. 2008, 99, 5368-5373.

[4]. D. F. Zhang, H. Zhang, L. Guo, K. Zheng, X. D. Han, Z. Zhang, *Journal of Materials Chemistry*. 2009, 19, 5220-5225.

[5]. J. L. Liu, Z. Y. Gao, H. J. Han, D. P. Wu, F. Xu, H. X. Wang, K. Jiang, *Chemical Engineering Journal*. 2012, 185, 151-159.

- [6]. X. Q. Ge, H. M. Hu, C. H. Deng, Q. Zheng, M. Wang, G. Y. Chen, *Materials Letters*. 2015, 141, 214-216.
- [7]. H. Zhang, Q. Zhu, Y. Zhang, Y. Wang, L. Zhao, B. Yu, *Advanced Functional Materials*. 2007, 17, 2766-2771.
- [8]. X. J. Wan, J. L. Wang, L. F. Zhu, J. N. Tang, *Journal of Materials Chemistry A*. 2014, 2, 13641.
- [9]. Y. M. Sui, Y. Zeng, W. T. Zheng, B. B. Liu, B. Zou, H. B. Yang, *Sensors and Actuators B: Chemical*. 2012, 171-172, 135-140.
